# Supplementary material
Source: PubMed Central journal article supplement (PMC3711081)
Supplement: NIHMS465834-supplement-Kuil-DendrSuppl.pdf [file NIHMS465834-supplement-Kuil-DendrSuppl.pdf]

## **Supporting Information for:**

### **Hybrid peptide dendrimers for imaging of chemokine receptor 4 (CXCR4) expression**

Joeri Kuil,<sup>a,b</sup> Tessa Buckle,<sup>a,b</sup> Joppe Oldenburg,<sup>a</sup> Hushan Yuan,<sup>c</sup> Alexander D. Borowsky,<sup>d</sup> Lee Josephson<sup>c</sup> and Fijis W.B. van Leeuwen<sup>a,b,\*</sup>

<sup>a</sup> Division of Diagnostic Oncology, the Netherlands Cancer Institute Antoni van Leeuwenhoek Hospital, 1066 CX Amsterdam, The Netherlands.

<sup>b</sup> Department of Radiology, Leiden University Medical Center, 2300 RC Leiden, The Netherlands

<sup>c</sup> Center for Molecular Imaging Research, Massachusetts General Hospital and Harvard Medical School, Building 149, 13th Street, Charlestown, MA 02129, USA

<sup>d</sup> Department of Pathology and Laboratory Medicine, Center for Comparative Medicine, School of Medicine, University of California at Davis, Sacramento, USA

\* Corresponding author. E-mail: f.w.b.van\_leeuwen@lumc.nl

## General

All chemicals were obtained from commercial sources and used without further purification. The reactions were monitored by thin layer chromatography (TLC). NMR spectra were taken using a Bruker Ultrashield 300 spectrometer (300 MHz  $^1\text{H}$  NMR, 75 MHz  $^{13}\text{C}$  NMR) and the chemical shifts are given in ppm ( $\delta$ ) relative to tetramethylsilane (TMS). Abbreviations used include singlet (s), doublet (d), doublet of doublets (dd) and unresolved multiplet (m). MS (ESI) spectra were measured on a Waters LCT<sup>TM</sup> Orthogonal Acceleration Time of Flight Mass Spectrometer equipped with a Waters 2795 Separation Module (Alliance HT) and a Waters 2996 Photodiode Array Detector (190 – 750 nm). HPLC was performed on a Waters HPLC system using a 1525EF pump and a 2489 UV detector. For preparative HPLC a Dr. Maisch GmbH Reprosil-Pur 120 C18-AQ 10  $\mu\text{m}$  (250  $\times$  20 mm) column was used and a gradient of 0.1% TFA in  $\text{H}_2\text{O}/\text{CH}_3\text{CN}$  9:1 to 0.1% TFA in  $\text{H}_2\text{O}/\text{CH}_3\text{CN}$  1:9 in 40 minutes (12 mL/min) was employed. For analytical HPLC a Dr. Maisch GmbH Reprosil-Pur C18-AQ 5  $\mu\text{m}$  (250  $\times$  4.6 mm) column was used and a gradient of 0.1% TFA in  $\text{H}_2\text{O}/\text{CH}_3\text{CN}$  95:5 to 0.1% TFA in  $\text{H}_2\text{O}/\text{CH}_3\text{CN}$  5:95 in 20 minutes (1 mL/min) was employed.

## Molecular modeling

The structures of MSAP label (**1**) (the succinimidyl group was omitted), dimer Glu( $\beta$ -Ala-OH)- $\beta$ -Ala-OH and tetramer Glu( $\beta$ -Ala-Glu( $\beta$ -Ala-OH)- $\beta$ -Ala-OH)- $\beta$ -Ala-Glu( $\beta$ -Ala-OH)- $\beta$ -Ala-OH were minimized in Chem3D Pro 12.0 using the MM2 force field (minimum RMS gradient = 0.100) and PDB files of these minimized structures were made. The PDB file of CXCR4 complexed with the Ac-TZ14011 analog CVX15 (PDB entry code 3OE0) was loaded in YASARA (<http://www.yasara.org>).<sup>1</sup> CXCR4 was deleted and the CVX15 peptide was modified to Ac-TZ14011 (Gln<sup>6</sup>  $\rightarrow$  Cit<sup>6</sup>; Lys<sup>7</sup>  $\rightarrow$  Arg<sup>7</sup>; D-Pro<sup>8</sup>  $\rightarrow$  D-Lys<sup>8</sup>; Gly<sup>15</sup> and D-Pro<sup>16</sup>  $\rightarrow$  deleted). Ac-TZ14011 was minimized in YASARA: a simulation cell, in which each axis was extended 5.0 Å from the molecule, was defined. The Amber99 forcefield was used and the temperature control was step-10 annealing, starting from 298 K and at every 10 simulation steps the velocity of all atoms was reduced to 90%. The simulation was stopped after 10 000 fs, when the atoms almost did not move anymore. A PDB file was made of the minimized Ac-TZ14011 peptide.

For the monomer Ac-TZ14011-MSAP (**3**) the PDB files of the minimized Ac-TZ14011 and MSAP label (**1**) were loaded and the MSAP label (**1**) was properly placed with respect to the amine of D-Lys<sup>8</sup> and a peptide bond was created, yielding a model of monomer Ac-TZ14011-MSAP (**3**).

For the dimer (Ac-TZ14011)<sub>2</sub>-MSAP (**7**) the PDB files of the minimized Ac-TZ14011 (2 ×), dimer Glu(β-Ala-OH)-β-Ala-OH and MSAP label (**1**) were loaded and the molecules were properly placed with respect to each other and peptide bonds were created, yielding a model of dimer (Ac-TZ14011)<sub>2</sub>-MSAP (**7**).

For the tetramer (Ac-TZ14011)<sub>4</sub>-MSAP (**10**) the PDB files of the minimized Ac-TZ14011 (4 ×), tetramer Glu(β-Ala-Glu(β-Ala-OH)-β-Ala-OH)-β-Ala-Glu(β-Ala-OH)-β-Ala-OH and MSAP label (**1**) were loaded and the molecules were properly placed with respect to each other and peptide bonds were created, yielding a model of tetramer (Ac-TZ14011)<sub>4</sub>-MSAP (**10**).

For the models of compounds **3**, **7** and **10** binding to CXCR4 (see Figure S1), the PDB files of CXCR4 with the CVX15 peptide (PDB entry code 3OE0) and of compound **3**, **7** or **10** were loaded. An Ac-TZ14011 peptide in compound **3**, **7** or **10** was overlaid onto CVX15 and CVX15 was deleted, yielding models of compounds **3**, **7** and **10** binding to CXCR4.

To estimate the size of compounds **3**, **7** and **10**, the largest distances between two atoms in the models were established. The sizes were 27.5 Å, 48.5 Å and 71.2 Å for compounds **3**, **7** and **10**, respectively.

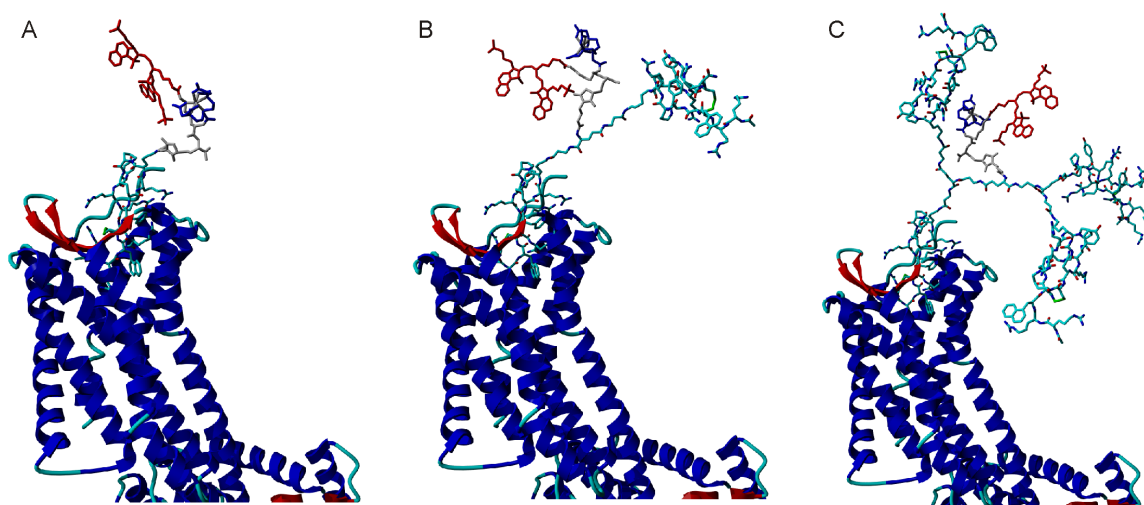

**Figure S1.** Molecular models of the Ac-TZ14011-MSAP derivatives binding to CXCR4. CXCR4 is shown in ribbon representation and monomer Ac-TZ14011-MSAP (**3**) (A), dimer (Ac-TZ14011)<sub>2</sub>-MSAP (**6**) (B) and tetramer (Ac-TZ14011)<sub>4</sub>-MSAP (**10**) (C) as stick models, which is colored by element. For clarity, the MSAP label is not colored by element: the CyAL-5.5<sub>b</sub> fluorophore is displayed in red, the indium-bound DTPA chelate in blue and the spacer in grey.

### MSAP reagent (**1**)

The multifunctional single attachment point (MSAP) reagent (**1**) was synthesized based on previously described procedures.<sup>2</sup>

### Ac-TZ14011 (**2**)

Ac-TZ14011 was synthesized according to previously described procedures.<sup>3</sup>

### Ac-TZ14011-MSAP (**3**)

Ac-TZ14011-MSAP was synthesized according to previously described procedures.<sup>2</sup>

### Boc-Glu( $\beta$ -Ala-OH)- $\beta$ -Ala-OH (**4**)

Boc-Glu-OH (9.10 g, 36.8 mmol),  $\beta$ -alanine methyl ester hydrochloride (14.0 g, 100 mmol) and N-hydroxysuccinimide (8.60 g, 75 mmol) were dissolved in 500 mL of DMF. DiPEA (17.4 mL, 100 mmol) was added and the solution was cooled to 0 °C. DCC (15.5 g, 75 mmol) was added and the mixture was stirred overnight at 20 °C. DMF was evaporated and H<sub>2</sub>O was added. The aqueous phase was extracted with EtOAc (3  $\times$ ). The

combined organic phases were washed with 0.1 M Na<sub>2</sub>CO<sub>3</sub> (3 ×), 5% citric acid (3 ×) and brine, dried with MgSO<sub>4</sub>, filtered and concentrated affording 9.8 g (23.5 mmol, 64%) of Boc-Glu(β-Ala-OMe)-β-Ala-OMe. The product was used without further purification.

Boc-Glu(β-Ala-OMe)-β-Ala-OMe (1.47 g, 10 mmol) was dissolved in 105 mL of dioxane and 37.5 mL of MeOH. 7.5 mL of 4 M NaOH (30 mmol) was added and the solution was stirred for 1 hour at 20 °C. The volatiles were evaporated and H<sub>2</sub>O was added. The aqueous phase was washed with EtOAc (2 ×), acidified with citric acid and extracted with EtOAc (5 ×). The combined organic phases were washed with 5% citric acid and brine, dried with MgSO<sub>4</sub>, filtered and concentrated. The product was purified by silica gel column chromatography (1% AcOH in CH<sub>2</sub>Cl<sub>2</sub>/MeOH 93:7) yielding 2.79 g (72%) of a Boc-Glu(β-Ala-OH)-β-Ala-OH as a white solid. <sup>1</sup>H NMR (DMSO-d<sub>6</sub>, 300 MHz) δ = 1.37 (s, 9H, 3 CH<sub>3</sub>), 2.03-2.07 (m, 2H, Glu β CH<sub>2</sub>), 2.33-2.39 (m, 4H, Glu δ CH<sub>2</sub> and CH<sub>2</sub>COOH), 2.62 (d, 2H, CH<sub>2</sub>COOH), 3.18-3.28 (m, 4H, 2 CH<sub>2</sub>CH<sub>2</sub>COOH), 3.82 (dd, 1H, Glu α CH), 6.79 (d, 1H, NH Boc), 7.79-7.86 (m, 2H, 2 β-Ala NH). <sup>13</sup>C NMR (DMSO-d<sub>6</sub>, 75 MHz) δ = 28.0 (Glu β CH<sub>2</sub>), 28.1 (3 CH<sub>3</sub>), 31.2 (Glu δ CH<sub>2</sub>), 33.8, 33.9, 34.7, 34.7 (4 β-Ala CH<sub>2</sub>), 71.8 (Glu α CH), 78.0 (Boc C), 155.1 (Boc CO), 171.2, 171.6 (2 amide CONH), 172.8 (2 COOH).

#### **Boc-protected dimer (Ac-TZ14011)<sub>2</sub> (5)**

Boc-Glu(β-Ala-OH)-β-Ala-OH (4) (1.95 mg, 5 μmol), Ac-TZ14011 (2) (35 mg, 12.5 μmol) and BOP (5.53 mg, 12.5 μmol) were dissolved in 2 mL of DMSO. DiPEA (17 μL, 100 μmol) was added and the mixture was stirred overnight at 20 °C, after which the mixture was purified by preparative HPLC. The product was obtained as a white fluffy solid (16.5 mg, 58%) after pooling of the appropriate fractions and lyophilization. MS (ESI): [M+3H]<sup>3+</sup> calculated 1522.78, found 1522.45; [M+4H]<sup>4+</sup> calculated 1142.34, found 1142.06; [M+5H]<sup>5+</sup> calculated 914.07, found 914.08; [M+6H]<sup>6+</sup> calculated 761.89, found 761.71.

#### **Dimer (Ac-TZ14011)<sub>2</sub> (6)**

Boc-protected dimer (Ac-TZ14011)<sub>2</sub> (5) (4.68 mg, 0.844 μmol) was dissolved in H<sub>2</sub>O (100 μL) and TFA (2 mL) and the solution was stirred for 3 hours at 20 °C. TFA was

evaporated and the product was lyophilized from CH<sub>3</sub>CN/H<sub>2</sub>O yielding the product in quantitative yield as a white fluffy solid. MS (ESI): [M+4H]<sup>4+</sup> calculated 1117.32, found 1117.56; [M+5H]<sup>5+</sup> calculated 894.06, found 894.25; [M+6H]<sup>6+</sup> calculated 745.22, found 745.39; [M+7H]<sup>7+</sup> calculated 638.90, found 639.06.

#### **Dimer (Ac-TZ14011)<sub>2</sub>-MSAP (7)**

Dimer (Ac-TZ14011)<sub>2</sub> (**6**) (2.27 mg, 0.397 μmol) and MSAP (**1**) (1.34 mg, 0.793 μmol) were dissolved in 800 μL of DMSO. DiPEA (2.6 μL, 15 μmol) was added and the solution was stirred overnight at 20 °C, after which the mixture was purified by preparative HPLC. The product was obtained as a blue fluffy solid (1.97 mg, 69%) after pooling of the appropriate fractions and lyophilization. MS (ESI): [M+6H]<sup>6+</sup> calculated 1006.82, found 1006.67; [M+7H]<sup>7+</sup> calculated 863.13, found 863.19; [M+8H]<sup>8+</sup> calculated 755.36, found 755.30.

#### **Boc-protected tetramer (Ac-TZ14011)<sub>4</sub> (8)**

Boc-protected dimer (Ac-TZ14011)<sub>2</sub> (**5**) (11.42 mg, 1.46 μmol) was dissolved in H<sub>2</sub>O (200 μL) and TFA (2.8 mL) and the solution was stirred for 3 hours at 20 °C. TFA was evaporated and the residue was dissolved in 1 mL of DMSO. DiPEA (5 μL, 29 μmol), Boc-Glu(β-Ala-OH)-β-Ala-OH (**4**) (0.19 mg, 0.50 μmol) and BOP (0.66 mg, 1.5 μmol) were added and the solution was stirred overnight at 20 °C, after which the mixture was purified by preparative HPLC. The product was obtained as a white fluffy solid (2.61 mg, 45%) after pooling of the appropriate fractions and lyophilization. MS (ESI): [M+8H]<sup>8+</sup> calculated 1161.47, found 1161.76; [M+9H]<sup>9+</sup> calculated 1032.53, found 1032.73; [M+10H]<sup>10+</sup> calculated 929.37, found 929.87; [M+11H]<sup>11+</sup> calculated 844.98, found 845.05; [M+12H]<sup>12+</sup> calculated 774.65, found 774.64.

#### **Tetramer (Ac-TZ14011)<sub>2</sub> (9)**

Boc-protected tetramer (Ac-TZ14011)<sub>4</sub> (**8**) (2.61 mg, 0.23 μmol) was dissolved in H<sub>2</sub>O (100 μL) and TFA (2 mL) and the solution was stirred for 3 hours at 20 °C. TFA was evaporated and the product was lyophilized from CH<sub>3</sub>CN/H<sub>2</sub>O yielding the product in quantitative yield as a white fluffy solid. MS (ESI): [M+9H]<sup>9+</sup> calculated 1021.41, found

1021.63;  $[M+10H]^{10+}$  calculated 919.37, found 919.50;  $[M+11H]^{11+}$  calculated 835.88, found 836.00.

#### **Tetramer (Ac-TZ14011)<sub>4</sub>-MSAP (10)**

Tetramer (Ac-TZ14011)<sub>4</sub> (**9**) (2.08 mg, 0.18  $\mu$ mol) and MSAP (**1**) (0.51 mg, 0.30  $\mu$ mol) were dissolved in 1 mL of DMSO. DiPEA (10  $\mu$ L, 57  $\mu$ mol) was added and the solution was stirred overnight at 20 °C, after which the mixture was purified by preparative HPLC. The product was obtained as a blue fluffy solid (0.97 mg, 50%) after pooling of the appropriate fractions and lyophilization. MS (ESI):  $[M+19H]^{19+}$  calculated 567.40, found 568.95;  $[M+33H]^{33+}$  calculated 327.08, found 327.86;  $[M+34H]^{34+}$  calculated 317.49, found 316.91.

#### **Ac-TZ14011-DTPA (11)**

Ac-TZ14011-DTPA was synthesized according to previously described procedures.<sup>3</sup>

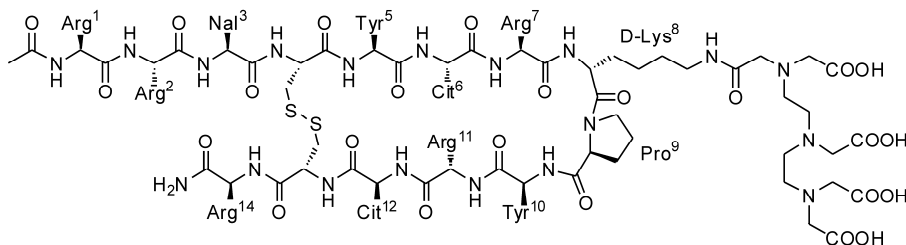

**Table S1.** Biodistribution of  $^{111}\text{In}$ -labeled Ac-TZ14011-DTPA (**11**), MSAP label (**1**), monomer Ac-TZ14011-MSAP (**3**), dimer (Ac-TZ14011) $_2$ -MSAP (**7**) and tetramer (Ac-TZ14011) $_4$ -MSAP (**10**) in MIN-O tumor bearing mice at 24 h post injecting.

| tissue              | uptake (%ID/g)                |                   |                                      |                                            |                                                |
|---------------------|-------------------------------|-------------------|--------------------------------------|--------------------------------------------|------------------------------------------------|
|                     | Ac-TZ14011-DTPA ( <b>11</b> ) | MSAP ( <b>1</b> ) | monomer Ac-TZ14011-MSAP ( <b>3</b> ) | dimer (Ac-TZ14011) $_2$ -MSAP ( <b>7</b> ) | tetramer (Ac-TZ14011) $_4$ -MSAP ( <b>10</b> ) |
| <b>Blood</b>        | 0.01 $\pm$ 0.00***            | 0.32 $\pm$ 0.09*  | 0.14 $\pm$ 0.02                      | 0.14 $\pm$ 0.03                            | 0.11 $\pm$ 0.01                                |
| <b>Brain</b>        | 0.00 $\pm$ 0.00               | 0.03 $\pm$ 0.01   | 0.02 $\pm$ 0.00                      | 0.03 $\pm$ 0.01                            | 0.02 $\pm$ 0.00                                |
| <b>Lungs</b>        | 0.13 $\pm$ 0.02***            | 0.65 $\pm$ 0.18*  | 1.02 $\pm$ 0.13                      | 2.13 $\pm$ 0.60                            | 1.68 $\pm$ 0.31                                |
| <b>Heart</b>        | 0.05 $\pm$ 0.00**             | 0.64 $\pm$ 0.12   | 0.89 $\pm$ 0.22                      | 0.60 $\pm$ 0.12                            | 0.43 $\pm$ 0.06*                               |
| <b>Liver</b>        | 5.08 $\pm$ 0.52**             | 5.76 $\pm$ 1.11** | 22.46 $\pm$ 5.46                     | 30.59 $\pm$ 5.45                           | 22.43 $\pm$ 0.67                               |
| <b>Kidneys</b>      | 27.07 $\pm$ 0.74***           | 6.49 $\pm$ 2.99   | 7.50 $\pm$ 1.39                      | 6.46 $\pm$ 1.36                            | 4.37 $\pm$ 0.52*                               |
| <b>Spleen</b>       | 1.14 $\pm$ 0.32**             | 0.93 $\pm$ 0.13** | 4.76 $\pm$ 1.23                      | 7.01 $\pm$ 1.45                            | 4.66 $\pm$ 0.46                                |
| <b>Stomach</b>      | 0.06 $\pm$ 0.01**             | 0.81 $\pm$ 0.45   | 0.81 $\pm$ 0.16                      | 0.97 $\pm$ 0.52                            | 1.09 $\pm$ 0.52                                |
| <b>Intestines</b>   | 0.10 $\pm$ 0.01***            | 1.02 $\pm$ 0.31*  | 1.85 $\pm$ 0.08                      | 2.06 $\pm$ 0.26                            | 1.56 $\pm$ 0.46                                |
| <b>Tumor</b>        | 0.19 $\pm$ 0.03               | n.d.              | 1.10 $\pm$ 0.60                      | 0.57 $\pm$ 0.19                            | 0.42 $\pm$ 0.10                                |
| <b>Muscle (paw)</b> | 0.03 $\pm$ 0.00***            | 0.22 $\pm$ 0.06   | 0.31 $\pm$ 0.01                      | 0.07 $\pm$ 0.03***                         | 0.08 $\pm$ 0.02***                             |

The significance with respect to  $^{111}\text{In}$ -labeled monomer Ac-TZ14011-MSAP (**3**) is indicated by the asterisks (\* =  $P < 0.05$ , \*\* =  $P < 0.01$ , \*\*\* =  $P < 0.001$ ).

## References

- (1) Wu, B., Chien, E.Y.T., Mol, C.D., Fenalti, G., Liu, W., Katritch, V., Abagyan, R., Brooun, A., Wells, P., Bi, F.C., Hamel, D.J., Kuhn, P., Handel, T.M., Cherezov, V., Stevens, R.C., Structures of the CXCR4 chemokine GPCR with small-molecule and cyclic peptide antagonists. *Science*, **2010**, *330*, 1066-1071.
- (2) Kuil, J., Buckle, T., Yuan, H., Van den Berg, N.S., Oishi, S., Fujii, N., Josephson, L., Van Leeuwen, F.W.B., Synthesis and evaluation of a bimodal CXCR4 antagonistic peptide. *Bioconjugate Chem.*, **2011**, *22*, 859-864.
- (3) Hanaoka, H., Mukai, T., Tamamura, H., Mori, T., Ishino, S., Ogawa, K., Iida, Y., Doi, R., Fujii, N., Saji, H., Development of a  $^{111}\text{In}$ -labeled peptide derivative targeting a chemokine receptor, CXCR4, for imaging tumors. *Nucl. Med. Biol.*, **2006**, *33*, 489-494.
- (4) Maglione, J.E., McGoldrick, E.T., Young, L.J., Namba, R., Gregg, J.P., Liu, L., Moghanaki, D., Ellies, L.G., Borowsky, A.D., Cardiff, R.D., MacLeod, C.L., Polyomavirus middle T-induced mammary intraepithelial neoplasia outgrowths: single origin, divergent evolution, and multiple outcomes. *Mol. Cancer Ther.*, **2004**, *3*, 941-953.
- (5) Namba, R., Young, L.J., Maglione, J.E., McGoldrick, E.T., Liu, S., Wurzb, G.T., DeGregorio, M.W., Borowsky, A.D., MacLeod, C.L., Cardiff, R.D., Gregg, J.P., Selective estrogen receptor modulators inhibit growth and progression of premalignant lesions in a mouse model of ductal carcinoma in situ. *Breast Cancer Res.*, **2005**, *7*, R881-889.
- (6) Namba, R., Young, L.J., Abbey, C.K., Kim, L., Damonte, P., Borowsky, A.D., Qi, J., Tepper, C.G., MacLeod, C.L., Cardiff, R.D., Gregg, J.P., Rapamycin inhibits growth of premalignant and malignant mammary lesions in a mouse model of ductal carcinoma in situ. *Clin. Cancer Res.*, **2006**, *12*, 2613-2621.
